1     **Differential excretory/secretory proteome of the adult female and male stages of**  
2                                    **the human blood fluke, *Schistosoma mansoni***

3     **Eric T. Kenney<sup>1</sup>, Victoria H. Mann<sup>1\*</sup>, Wannaporn Ittiprasert<sup>1</sup>, Bruce A. Rosa<sup>2</sup>, Makedonka**  
4     **Mitreva<sup>2</sup>, Bethany K. Bracken<sup>3</sup>, Alex Loukas<sup>4</sup>, Paul J. Brindley<sup>1,\*</sup>, Javier Sotillo<sup>5,\*</sup>**

5     <sup>1</sup>Department of Microbiology, Immunology & Tropical Medicine, and Research Center for Neglected  
6     Diseases of Poverty, School of Medicine and Health Sciences, George Washington University,  
7     Washington, DC, 20037 USA

8     <sup>2</sup>Department of Internal Medicine, Washington University of St. Louis School of Medicine, St.  
9     Louis, MO, USA

10    <sup>3</sup>Charles River Analytics, Inc., Cambridge, MA, 02138, USA

11    <sup>4</sup>Centre for Molecular Therapeutics, Australian Institute of Tropical Health and Medicine, James  
12    Cook University, Cairns, Queensland, 4878 Australia

13    <sup>5</sup>Parasitology Reference and Research Laboratory, Centro Nacional de Microbiología, Instituto de  
14    Salud Carlos III, Madrid, España

15    \* **Correspondence:**

16    Javier Sotillo, [javier.sotillo@isci.iii.es](mailto:javier.sotillo@isci.iii.es); Paul J. Brindley, [pbrindley@gwu.edu](mailto:pbrindley@gwu.edu)

17    **Keywords: Schistosoma, proteomics, secretome, label-free quantification, adults**

18

19 **Abstract**

20 Intricate molecular communication between the schistosome (flatworms) and its mammalian host, as  
21 well as between paired male and female schistosomes has shaped the secreted proteome of these  
22 flatworms. Whereas the schistosome egg is responsible for the disease manifestations of chronic  
23 schistosomiasis, the long lived, adult female and male stages also release mediators that facilitate  
24 their long-lived intra-vascular existence in a hostile niche where they are bathed in immune cells and  
25 effector molecules. However, despite their importance, no studies have focused on analysing the  
26 excretory/secretory products (ESPs) from adult schistosomes.

27 Herein, ESPs from cultured *Schistosoma mansoni* male or female adult worms were identified,  
28 quantified, compared and contrasted using a label-free proteomic approach. Approximately 1,000  
29 proteins were identified, from which almost 800 could be finally quantified. Considering the proteins  
30 uniquely identified and proteins with a significantly regulated expression pattern in male or female  
31 flukes, a total of 370 and 140 proteins were more abundantly secreted by males and females,  
32 respectively. Using functional analysis networks showing the gene ontology terms and KEGG  
33 pathways with the highest significance, we observed that male schistosomes secrete proteins related  
34 to carbohydrate metabolism, cytoskeletal organisation more abundantly than females, while female  
35 worms secreted more hydrolases and proteins involved in cellular homeostasis than males.

36 This analysis doubles the number of previously reported ESPs from *S. mansoni*, contributing to a  
37 better understanding of the host-parasite dynamic interactions. Furthermore, these findings expand  
38 potential vaccine and diagnostic candidates for this neglected tropical disease pathogen, which will  
39 enable deeper understanding of the molecular communication critical to parasitism.

## 40 **1 Introduction**

41 Schistosomiasis is a major neglected tropical disease and is considered the most important  
42 helminthiasis in terms of morbidity and mortality. More than 200 million people are infected  
43 worldwide with 700 million at risk of infection. This remains a major public health problem,  
44 particularly in sub-Saharan Africa (Colley et al., 2014;McManus et al., 2018). Human  
45 schistosomiasis is caused by six species of blood flukes: *Schistosoma guineensis*, *S. haematobium*, *S.*  
46 *intercalatum*, *S. japonicum*, *S. mansoni*, and *S. mekongi*. Nowadays, the predominant human species  
47 are *S. haematobium* and *S. mansoni*, given the reduction of infection in recent decades caused by *S.*  
48 *japonicum* in the Yangtze River basin provinces of China (Wang et al., 2021). Urogenital  
49 schistosomiasis caused by hybrids of *S. haematobium* and *S. bovis* and relatives is spreading in West  
50 Africa (Webster et al., 2006;Huysse et al., 2009) and in Corsica (Boissier et al., 2016;Rothe et al.,  
51 2021).

52 Male and female schistosomes dwell in copula within the mesenteric veins (*S. mansoni*, *S.*  
53 *japonicum*) or the vesical venous plexus (*S. haematobium*) of the human, laying hundreds to  
54 thousands (depending on the species) of fertilized eggs each day. The eggs traverse the intestinal wall  
55 (e.g., *S. mansoni*) or the bladder wall (*S. haematobium*) and exit the host to the external environment  
56 in feces or urine, respectively. However, many eggs fail to exit the infected person and are retained in  
57 host tissues where they induce inflammation, granuloma, and fibrosis (McManus et al., 2018). In the  
58 external environment, the eggs hatch when they reach freshwater, each releasing a free-living larva,  
59 the miracidium, which is ciliated and seeks to infect the obligate intermediate host, a snail to continue  
60 the transmission of the disease. Within the snail, the schistosome undergoes cycles of asexual  
61 reproduction through mother and daughter sporocyst stages, eventually shedding thousands of  
62 cercariae into the water. The cycles of asexual reproduction within the snail require several weeks  
63 before cercariae are released. The cercaria is the infectious developmental stage for humans and other

64 permissive mammals. After penetrating the skin, the cercaria sheds its tail and the juvenile larva, the  
65 schistosomulum, migrates within the circulatory system, reaching the lungs, the liver, and eventually  
66 the portal venous system or the venous system that drains the pelvic organs where the fully mature  
67 flukes pair and the female produces eggs, completing the developmental cycle.

68 Whereas the schistosome egg is responsible for the disease manifestations of chronic schistosomiasis,  
69 as well as orchestrating the hallmark immunological transition from a Th1 to Th2 response (Pearce  
70 and MacDonald, 2002; Schwartz and Fallon, 2018; Acharya et al., 2021), the long lived, adult female  
71 and male stages also release mediators that facilitate their long-lived intra-vascular existence in a  
72 hostile niche where they are bathed in immune cells and effector molecules. These mediators, also  
73 known as excretory/secretory products (ESPs), are secreted (or released) from the esophageal gland,  
74 the gut epithelium and from the tegument of schistosomes, making it a highly diverse mixture of  
75 molecules. ESPs from several developmental stages and species of schistosomes have been  
76 described in depth, e.g., (Liu et al., 2009; Mathieson and Wilson, 2010; Hall et al., 2011; Dvořák et al.,  
77 2016; Sotillo et al., 2016; Floudas et al., 2017; De Marco Verissimo et al., 2019; Sotillo et al.,  
78 2019; Kifle et al., 2020; Neves et al., 2020; Chen et al., 2022), although the diversity, role, and  
79 packaging of these secreted and excreted antigens, including as cargo within extracellular vesicles,  
80 may not yet be fully characterized or deciphered, e.g., (Acharya et al., 2021). An early study of adults  
81 stage *S. japonicum* ESPs showed the presence of canonical proteins such as metabolic enzymes, heat  
82 shock proteins (HSPs), detoxification proteins, and peptidases (Liu et al., 2009). Other studies  
83 focusing strictly on the schistosome “vomit” (proteins secreted only by the gut epithelium)  
84 highlighted the presence of different saposins, ferritins, and cathepsins among other molecules (Hall  
85 et al., 2011). Furthermore, tetraspanins, annexins, calpain, and several transporters and cytoskeletal  
86 proteins have been identified on the tegument of *S. mansoni* adult worms by different techniques  
87 (Braschi et al., 2006a; Braschi et al., 2006b; Braschi and Wilson, 2006).

88 Here, the ESPs in cultured supernatants from adult male and adult female *S. mansoni* were isolated  
89 and compared using a label-free proteomic approach for the first time, increasing the coverage of the  
90 published secretome. About 1,000 proteins were identified, from which ~ 800 could be finally  
91 quantified. In sum, this new analysis at least doubles the number of proteins known in these extracts  
92 (Hall et al., 2011; Wilson, 2012), substantially expanding the catalogue of ESPs from *S. mansoni*,  
93 which provides new insights of the host-parasite interplay. In turn, we augment the number of  
94 potential vaccine and diagnostic candidates listed previously for this neglected tropical disease agent.

95

## 96 **2 Materials and methods**

### 97 **2.1 Ethics**

98 Mice experimentally infected with *S. mansoni*, obtained from the Schistosomiasis Resource Center  
99 (SRC) at the Biomedical Research Institute (BRI), MD were housed at the Animal Research Facility  
100 of the George Washington University (GWU), which is accredited by the American Association for  
101 Accreditation of Laboratory Animal Care (AAALAC no. 000347) and has an Animal Welfare  
102 Assurance on file with the National Institutes of Health, Office of Laboratory Animal Welfare,  
103 OLAW assurance number A3205-01. All procedures employed were consistent with the Guide for  
104 the Care and Use of Laboratory Animals. The Institutional Animal Care and Use Committee  
105 (IACUC) at GWU approved the protocol used for maintenance of mice and recovery of  
106 schistosomes.

### 107 **2.2 Schistosomes**

108 Swiss-Webster albino mice were euthanized seven weeks after infection with *S. mansoni*, livers were  
109 removed at necropsy, schistosome eggs recovered from the livers, and adult worms from the portal  
110 circulation as described (Dalton et al., 1997).

### 111 **2.3 Isolation of adult excretory/secretory products**

112 For the collection of excretory-secretory products (ESPs), adult *S. mansoni* were provided by  
113 Schistosomiasis Resource Center (SRC) of the Biomedical Research Institute (BRI), Rockville, MD.  
114 The worms were sorted with forceps to separate males and females, rinsed briefly in 1x phosphate  
115 buffered saline (PBS) (Corning), and subsequently transferred to 100 x 20 mm tissue culture plates  
116 (Sarstedt) containing 30 mL of serum-free Dulbecco's Modification of Eagle's Medium (DMEM)  
117 (Corning) supplemented with 2% Antibiotic-Antimycotic (Gibco). Secretion of ESP into the serum-  
118 free medium was facilitated by continuous incubation at 37°C, 5% CO<sub>2</sub> in air (Neves et al., 2020). At  
119 intervals of 24 hours over seven days, 20 mL of culture supernatant was removed with minimal  
120 disturbance to the schistosomes and stored at -80°C. The drawn medium was retained for storage and  
121 was replaced with fresh medium to the culture at each time point. At the conclusion of the collection  
122 period, the ESP-containing media were thawed gradually on wet ice, after which ESP was  
123 concentrated using Centricon Plus-70 Centrifugal Filter Units (Millipore) featuring a 3 kDa nominal  
124 molecular size limit. Concentration by centrifugation on the 3 kDa membrane was undertaken at  
125 3,220 rpm at 4°C using an Eppendorf 5810R centrifuge fitted with an A-4-62 swinging bucket rotor.  
126 Concentrated ESP was resuspended and reconcentrated twice using volumes of chilled PBS  
127 equivalent to the starting volume of the sample. Protein concentration was ascertained by the Pierce  
128 BCA Protein Assay Kit (Thermo Fisher) method, and concentrated ESP was aliquoted and stored at -  
129 80°C.

### 130 **2.4 Mass spectrometry analysis**

131 Three biological replicates of ES from males, females and mixed samples were individually  
132 processed as follows. Samples were freeze-dried and dissolved with 22 mL of 50 mM ammonium  
133 bicarbonate. Two (2) mL was used to quantify the protein concentration with Qubit (Invitrogen)

134 reagent according to the manufacturer's instructions. Ten (10) mg of protein was taken and volumes  
135 set to 22.5 mL of 50 mM ABC. Reduction and alkylation were performed by incubating samples at  
136 60 °C for 20 min with 2 mM dithiothreitol followed by a 30 min incubation at RT in the dark with  
137 5.5 mM 2-iodoacetamide. Samples were then in-solution digested with 400 ng trypsin overnight at 37  
138 °C and acidified with 10% TFA to a final concentration of 1%. Digested peptides were finally  
139 concentrated by speed vacuum to 15 µL.

140 Five (5) µl of peptide mixtures were loaded onto a trap column (3µ C18-CL, 350 µm x 0.5mm;  
141 Eksigent Technologies, Redwood City, CA) and desalted with 0.1% TFA at 5 µl/min during 5 min.  
142 The peptides were then loaded onto an analytical column (3µ C18-CL 120 □, 0.075 x 150 mm;  
143 Eksigent) equilibrated in 5% acetonitrile 0.1% FA. Elution was carried out with a linear gradient of  
144 15-40 % B in A for 60 min (A: 0.1% FA; B: ACN, 0.1% FA) at a flow rate of 300 nL/min. Peptides  
145 were analysed in a mass spectrometer nanoESI qQTOF (6600+ TripleTOF, ABSCIEX). Sample was  
146 ionized in a Source Type: Optiflow < 1 µL Nano applying 3.0 kV to the spray emitter at 175 °C.  
147 Analysis was carried out in a data-dependent mode. Survey MS1 scans were acquired from 350–1400  
148 m/z for 250 ms. The quadrupole resolution was set to 'LOW' for MS2 experiments, which were  
149 acquired 100–1500 m/z for 25 ms in 'high sensitivity' mode. The following switch criteria were  
150 used: charge: 2+ to 4+; minimum intensity; 250 counts per second (cps). Up to 100 ions were  
151 selected for fragmentation after each survey scan. Dynamic exclusion was set to 15 s.

## 152 **2.5 Database search and protein quantification**

153 Database searches were performed using FragPipe (v16.0) with MSFragger (v3.3) (Kong et al., 2017)  
154 and Philosopher (v4.0) (da Veiga Leprevost et al., 2020) against a concatenated target/decoy database  
155 consisting of the *S. mansoni* proteome (UP000008854) and common contaminants from Uniprot  
156 (downloaded 30 June 2021; 14,615 proteins). For the MSFragger analysis, precursor and fragment

157 mass tolerance were both set to 20 ppm. Mass calibration and parameter optimization were enabled,  
158 and isotope error was set to 0/1/2 with two missed trypsin cleavages allowed. The peptide length was  
159 set from 7 to 50, and the peptide mass was set to 500 to 5000 Da. Carbamidomethylation of C  
160 (+57.021464 Da) was set as fixed modification and Oxidation of M (+15.994915 Da) and acetylation  
161 of protein N-term (+42.010565 Da) as variable modifications. Philosopher (da Veiga Leprevost et al.,  
162 2020) with PeptideProphet (Keller et al., 2002) and ProteinProphet (Nesvizhskii et al., 2003) was  
163 used to estimate the identification FDR. The PSMs were filtered at 1% PSM and 1% protein  
164 identification FDR. Quantification and match between runs (MBR) was performed with IonQuant  
165 using default values (Yu et al., 2021).

166 Mass spectrometry data along with the identification results have been deposited in the  
167 ProteomeXchange Consortium via the PRIDE partner repository (Vizcaino et al., 2013) with the  
168 dataset identifier PXD030699.

## 169 **2.6 Bioinformatic analysis of proteomic sequence data**

170 Label-free quantitative (LFQ) analysis of identified proteins was performed with the MSstats R  
171 package (Choi et al., 2014) using default parameters (equalizeMedians as normalization method; log  
172 transformation: 2; Tukey's median polish as the summary method; censored values in intensity  
173 column: null and MBimpute: false). Using a power calculation of 0.9 and FDR of 0.05, fold-changes  
174 were considered as significant when  $\geq 2.450$  and adjusted  $p$ -value  $\leq 0.05$ . STRINGDB  
175 <https://string-db.org> was used to perform a PPI analysis based on confidence in the interaction  
176 (minimum required interaction score  $\geq 0.7$ ) and the network was visualized using Cytoscape. The  
177 Cytoscape plugin ClueGO was used to integrate the Kyoto Encyclopedia of Genes and Genomes  
178 (KEGG), and Gene Ontology information (including biological processes, immune processes and  
179 molecular functions) (Bindea et al., 2009). The enrichment tests for terms and groups were two-sided



180 tests based on the hyper-geometric distribution with a Kappa Score Threshold of 0.4. All GO terms  
181 that were significant with  $P < 0.05$  (after correcting for multiple testing using the Bonferroni step  
182 down false discovery rate correction), ranged between 3-8 tree intervals and contained a minimum of  
183 three genes (representing at least 4% from the total number of associated genes) were selected for  
184 further analysis. For each group/cluster, only the node with the smallest adjusted  $P$ -value was  
185 annotated.

186

187

### 188 **3 Results**

#### 189 **3.1 *S. mansoni* adult males secrete more proteins in culture than adult female worms**

190 *S. mansoni* adult worms were obtained from experimentally infected mice and separated into three  
191 different groups: males (M), females (F) or left coupled as male and female pairs (MF). The worms  
192 were cultured for seven days and the secreted proteins analysed by LC-MS/MS. A label-free  
193 quantitative (LFQ) analysis was performed to identify the proteins with significantly up- or down-  
194 regulated abundance in the secretomes of all three sample groups. An input file containing unique  
195 and razor peptides for 934 validated proteins was generated by MSFragger (Supplementary Table  
196 S1). Data was normalised using medians of summed intensities (Supplementary Figure 1). MSstats  
197 was used to estimate the power of the analysis performed. For our analysis, and to have a power  
198 calculation = 0.9 and FDR = 0.05, fold-changes were considered as significant when  $\geq 2.450$  ( $\text{Log}_2 \geq$   
199 1.3) and the adjusted  $P$ -value  $\leq 0.05$  (Supplementary Figure 2).

200 The quantitative proteomic analysis revealed a clear sex-dependent protein profile. For the M vs. F  
201 comparison, a total of 793 proteins were quantified, from which 237 and 75 were uniquely detected  
202 in males and females, respectively (Supplementary Table S2). Furthermore, the relative abundance of

203 133 proteins was significantly higher in the secretome of males (Table 1; Figure 1; Supplementary  
204 Table S2), while the abundance level of 65 proteins was significantly higher in the secretome of  
205 females (Table 2; Figure 1; Supplementary Table S2).

206 When comparing MF vs. M, 27 and 15 proteins were exclusively identified in MF and M,  
207 respectively and could not be, thus, quantified. However, the relative abundance of the remaining 700  
208 proteins was not significantly different (Supplementary Figure 3), suggesting that males have a  
209 bigger contribution to the total MF secretome than females. It is worth noting that some well-  
210 characterised *Schistosoma* spp. vaccine candidates (26) were upregulated or uniquely found in the  
211 secretome of females (i.e., A0A5K4F8N6\_SCHMA (Sm-TSP-2), Q8MNY2\_SCHMA (cathepsin B-  
212 1), A0A5K4EE66\_SCHMA (Thioredoxin glutathione reductase) or males (i.e.  
213 A0A3Q0KIP4\_SCHMA, A0A3Q0KD88\_SCHMA (paramyosin), FABP\_SCHMA (Sm14),  
214 GST26\_SCHMA (Glutathione S-transferase 26), G4V6B9\_SCHMA (triose phosphate isomerase)).  
215 Furthermore, two saposins (G4VBU4\_SCHMA and A0A3Q0KK40\_SCHMA) were also upregulated  
216 in the secretome of females. It is also worth highlighting that five different tetraspanins  
217 (A0A3Q0KTH5\_SCHMA, G4LUN6\_SCHMA, A0A5K4FD80\_SCHMA, Q86D97\_SCHMA and  
218 G4LWW2\_SCHMA) were uniquely found in the secretome of females, while Sm-TSP-2 was found  
219 upregulated in the secretome of females.

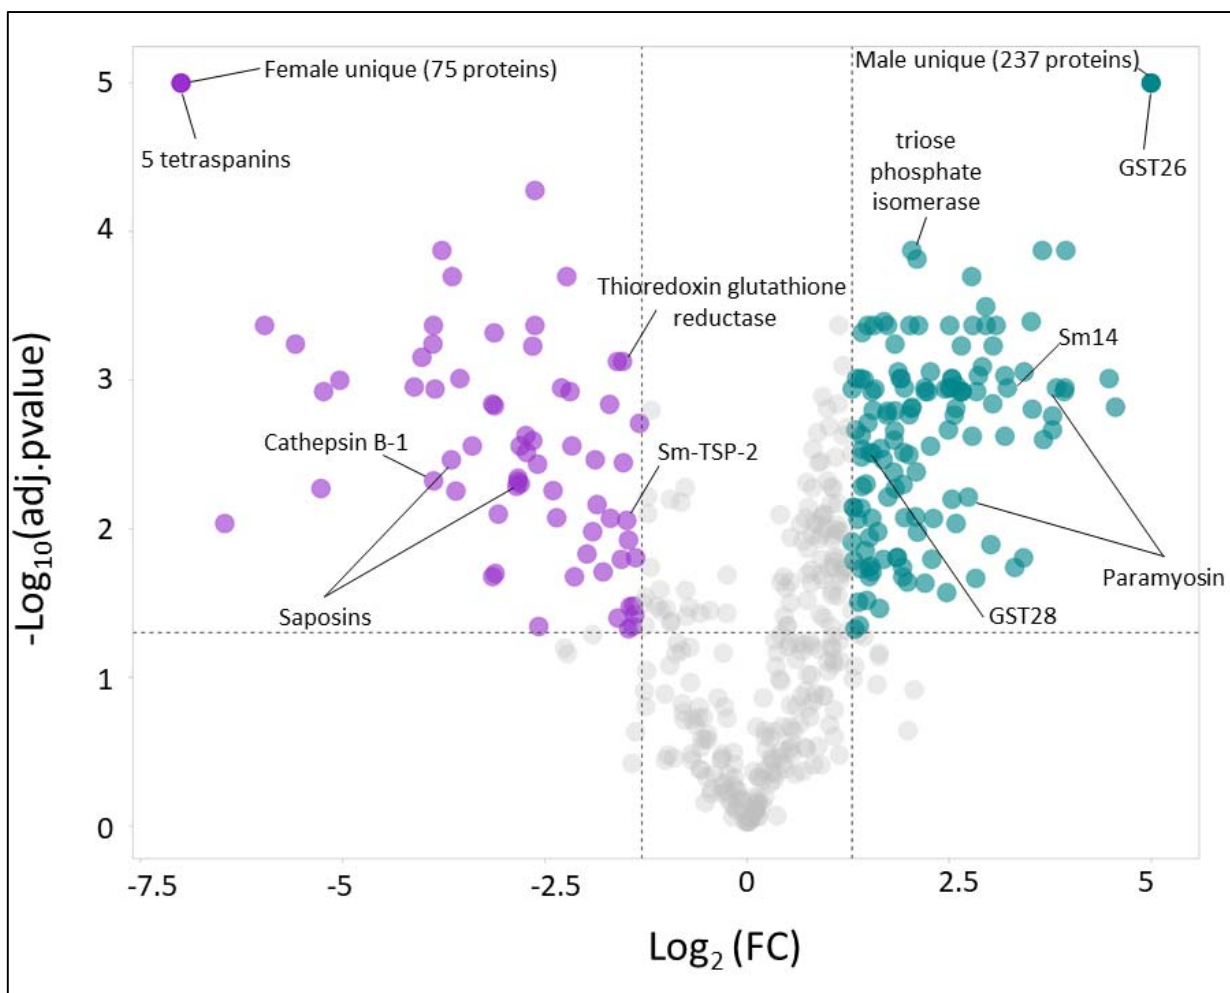

221 **Figure 1.** Volcano plot highlighting the proteins with significantly differential relative protein  
222 abundance levels in the secretomes of male (M) and females (F) *Schistosoma mansoni* flukes.

223

224 **3.2 *S. mansoni* male adult worms secrete proteins implicated in carbohydrate metabolism,**  
225 **redox functions and cytoskeletal organisation.**

226 A protein-protein association (PPA) analysis of proteins uniquely secreted or upregulated in the  
227 secretome of *S. mansoni* adult males revealed a strong network of interacting proteins.  
228 Approximately 70% of the proteins interacted in one or multiple clusters with other proteins. While  
229 most unique and upregulated proteins interacted together, one cluster of male-unique proteins could  
230 be differentiated (Fig. 2A, circle), which included splicing factors, RNA binding proteins and

231 ribonucleoproteins. Furthermore, a clear cluster of proteins with upregulated abundance in males was  
232 found to be associated with glycolysis and gluconeogenesis pathways (Fig. 2A, rectangle).

233 The functional analysis showed at least 7 groups (adjusted P-value < 0.0005) containing 67 non-  
234 redundant biological terms (adjusted P-value < 0.05), including “glucose metabolic process”  
235 (GO:0006006), “cell redox homeostasis” (GO:0045454), “pentose phosphate pathway”  
236 (KEGG:00030), “starch and sucrose metabolism” (KEGG:00500, “glycolysis/Gluconeogenesis  
237 (KEGG:00010), “actin filament depolymerization” (GO:0030042) and “carbohydrate metabolic  
238 process” (GO:0005975) (Fig. 2B, Supplementary Table 3).

239 The cluster containing more terms (31 nodes) and proteins (total of 54 proteins) was associated with  
240 pathways involved in carbohydrate metabolism (a gene ontology term also associated with the  
241 KEGG pathway glycolysis/gluconeogenesis) (Fig. 2B, Supplementary Table 3). Proteins involved in  
242 this pathway included phosphoenolpyruvate carboxykinase, glucose-6-phosphate dehydrogenase and  
243 malate dehydrogenase among others. The second cluster with the highest number of terms (24 nodes)  
244 and proteins (22 proteins) was associated with a cytoskeleton organisation function, and included  
245 proteins such as calponin, paramyosin, filamin, and tubulin.

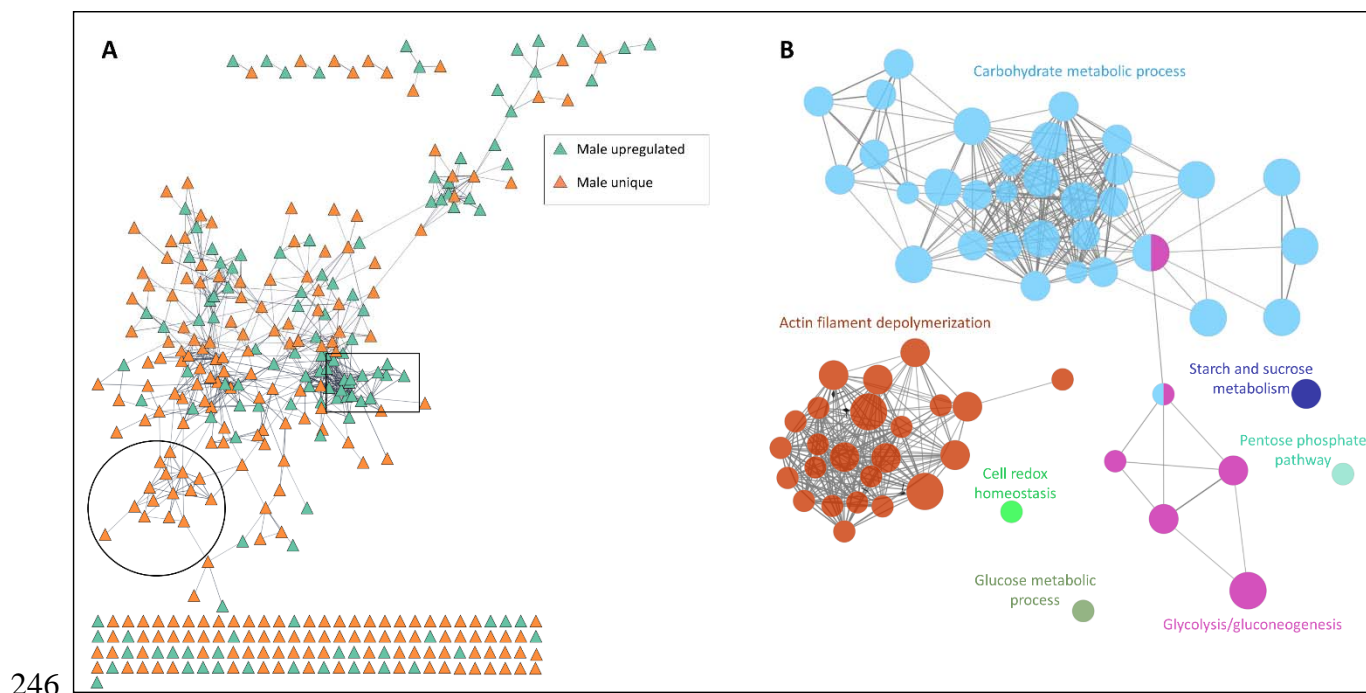

247 **Figure 2.** Functional analysis network of proteins uniquely secreted or upregulated in the secretome  
248 of adult *Schistosoma mansoni* males. (A) Protein-protein association network of all proteins uniquely  
249 present or with significantly higher abundance in the secretome of adult *S. mansoni* males. (B)  
250 Functional analysis network showing the gene ontology terms and KEGG pathways with the highest  
251 significance.

252

### 253 3.3 *S. mansoni* female adult worms secrete proteins with hydrolase activity and cellular 254 homeostasis

255 The PPI analysis of proteins uniquely secreted or upregulated in the secretome of *S. mansoni* adult  
256 females showed that only around 50% of the proteins interacted in one or multiple clusters with other  
257 proteins. Contrary to that observed for male schistosomes, uniquely female-secreted proteins or  
258 proteins with an upregulated expression in the secretome of females did not cluster together.

259 The functional analysis showed at least 6 groups (adjusted P-value < 0.005) containing 54 non-  
260 redundant biological terms (adjusted P-value < 0.05), including “lysosome” (KEGG:04142),  
261 “calcium-dependent phospholipid binding” (GO:0005544), “transmembrane transporter activity”

262 (GO:0022857), “hydrolase activity” (GO:0016798), “peptidase activity” (GO:0070011) and  
263 “transition metal ion transport” ((GO:0000041) (Fig. 3B, Supplementary Table 4). The cluster with  
264 the highest number of terms and proteins was associated with the cellular homeostasis process (28  
265 nodes and 20 proteins) and included proteins such as ferritin and thioredoxin glutathione reductase  
266 (Fig. 3B, Supplementary Table 4). Additionally, two clusters associated with peptidase activity (9  
267 nodes and 15 proteins) and hydrolase activity (7 nodes and 11 proteins) were also highlighted to be  
268 of importance in this analysis (Fig. 3B, Supplementary Table 4). These two clusters included proteins  
269 such as galactosidase, glucosidase, cathepsin B, cathepsin L, carboxypeptidase and other cysteine-  
270 and serine-peptidases (Supplementary Table 4).

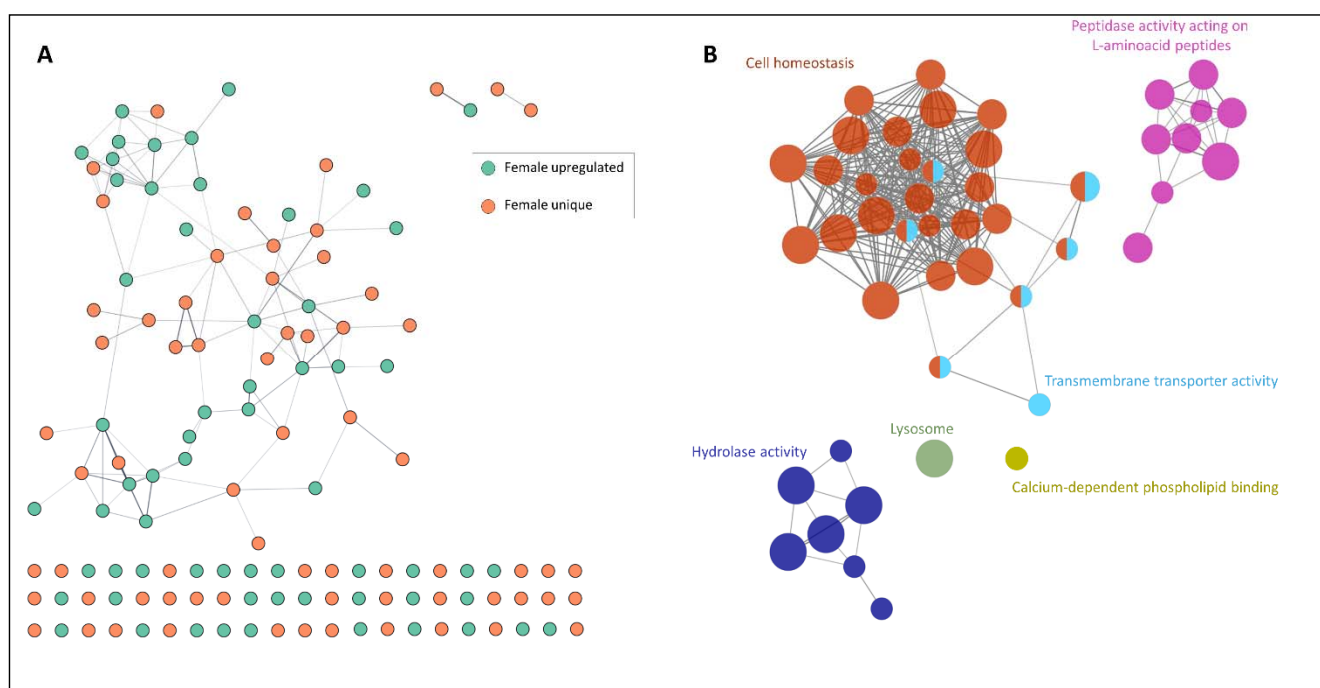

271

272 **Figure 3.** Functional analysis network of proteins uniquely secreted or upregulated in the secretome  
273 of *Schistosoma mansoni* adult females. (A) Protein-protein association network of all proteins  
274 uniquely present or with a significantly upregulated expression in the secretome of *S. mansoni* adult  
275 females. (B) Functional analysis network showing the gene ontology terms and KEGG pathways  
276 with the highest significance.

277

278

## 279 4 Discussion

280 Schistosomes are one of the most important groups of human helminths in terms of public health.  
281 Unlike other trematodes, they are usually found as paired couples, with the female adult worm living  
282 within the gynaecophoric canal of the male (McManus et al., 2018). Indeed, this dioecy distinguishes  
283 schistosomes from other flatworms that infect humans. This sexual dimorphism has different  
284 biological implications, including the need for pairing to achieve sexual maturity in females  
285 (reviewed in (Moore et al., 1954)), and favouring a division of labour between the more muscular  
286 male migrating towards oviposition sites and the filiform female reaching small vessels to discharge  
287 the eggs (Loker and Brant, 2006). Yet despite their importance in male-female communication, only  
288 a handful of studies have analysed in depth the molecules and receptors involved in these interactions  
289 (Armstrong, 1965;Basch and Basch, 1984;Gupta and Basch, 1987;Chen et al., 2022). In this study we  
290 aimed to comprehensively characterise the protein complement of the ESPs from adult stage female  
291 and male *S. mansoni* to increase knowledge into the biology of these worms and to augment the  
292 repertoire of potential diagnostic and vaccine candidates for schistosomiasis.

293 Molecules released and secreted by schistosomes, including tegumental proteins and digestive  
294 enzymes (in the vomitus (Hall et al., 2011)) play a key role in host-parasite and male-female  
295 interactions, and their expression and secretion is driven by the divergent requirements and functions  
296 of both schistosome sexes. For instance, in *S. japonicum* and *S. bovis*, the male schistosome exhibits  
297 significantly more proteins in its tegument than the female, both in total number and in unique  
298 proteins(Perez-Sanchez et al., 2008;Zhang et al., 2013)). Our present findings are in agreement with  
299 this situation, and indeed are not unexpected given the larger size of the male schistosome.  
300 Furthermore, the protein and small RNA content of *S. japonicum*-secreted extracellular vesicles and  
301 the expression of phosphoproteins from *S. mekongi* also are sex-dependant (Du et al., 2020). Our

302 results also revealed a gender-specific divergence in the secretome landscape in *S. mansoni*, which,  
303 as shown at the transcriptomic level, could be beneficial for the sexual dimorphism in this species  
304 (Fitzpatrick et al., 2005;Anderson et al., 2015;Picard et al., 2016). Recent studies have shown that *S.*  
305 *japonicum* female-tegumental proteins are involved in protein glycosylation and lysosome function,  
306 while male-tegumental proteins play a role in intracellular signal transduction, regulation of actin  
307 filament polymerization, and proteasome core complex (Zhang et al., 2013). Our results also showed  
308 functions related to actin filament depolymerisation and lysosome to be important in male and  
309 female-secreted proteins, respectively. While proteins belonging to the lysosome KEGG ontology is  
310 a markedly heterogeneous group including cathepsin B peptidases, tetraspanins and glycosidases,  
311 proteins related to actin filament depolymerisation play a specific role in cytoskeletal regulation.  
312 These results confirm previous transcriptomic studies and support the hypothesis of the role of the  
313 male schistosome in physical support of the female to facilitate migration against the flow of the  
314 portal circulation toward the mesenteric venules where the female schistosome deposits the eggs  
315 (Fitzpatrick et al., 2005;Cai et al., 2016;Phuphisut et al., 2018).

316 Glucose metabolism is essential in female worms due to the energy requirement to support the  
317 production and release of the large number of eggs laid daily - around 300 eggs per female per day in  
318 *S. mansoni* (Cheever et al., 1994). Glycogen consumption, however is paramount in other  
319 schistosome functions such as muscle contraction and tegumental membrane repair, both being  
320 significantly enriched among proteins more abundant in the adult male versus the female schistosome  
321 (Gobert et al., 2003). Earlier transcriptomic investigations revealed that the expression of glucose  
322 transporters including gtp1 and gtp4 was not influenced by the sex of the schistosome (Cai et al.,  
323 2016). By contrast, we observed significantly elevated abundance of GTP1 (Smp\_012440,  
324 Q26579\_SCHMA) and of other glucose transporters (Smp\_105410, G4VC44\_SCHMA) in the  
325 secretome of the female *S. mansoni*, likely the result of an increased expression in the tegument.



326 These discrepancies could be in part explained since transcriptomic analysis was performed on whole  
327 worms whereas our study focused solely on the ESPs. Furthermore, other key glycolytic enzymes  
328 such as aldolase (Smp\_042160.1, ALF\_SCHMA) and glycerol-3-phosphate dehydrogenase (G3PDH,  
329 Smp\_030500.1, C4Q5J8\_SCHMA) were more abundantly secreted by males. Our results agreed with  
330 previous findings that reported the higher consumption of glucose and importance of glycogen  
331 storage in the male worm, which could reflect the muscular effort involved in transporting the female  
332 through the portal vasculature, and the need by the female to transport these molecules from the male  
333 (Skelly et al., 2014). Notably from the viewpoint of infection control, aldolase and G3PDH have  
334 been a focus of vaccines and other intervention targets (Dessein et al., 1988;Goudot-Crozal et al.,  
335 1989;Tallima et al., 2017).

336 In addition, the findings indicate that enzymes such as hydrolases and peptidases play an important  
337 role in the biology of female schistosomes. Hydrolases are a common group of proteins that include  
338 lipases, phosphatases, and glycosidases among others. In the case of female schistosomes, several  
339 glycosidases were found more abundantly secreted, including beta-glucosidase (Smp\_043390,  
340 A0A3Q0KF32\_SCHMA), alpha-galactosidase (Smp\_089290, G4VLE3\_SCHMA), and several  
341 alpha-amylases. Furthermore, it has been suggested that hydrolases released by the schistosome egg  
342 contribute to the transit of the egg and the circumoval granuloma across the intestinal wall and also  
343 with the nutritional requirements of the embryo (Cesari et al., 2000). Despite our findings, we cannot  
344 rule out that hydrolases detected here could have been secreted by eggs and did not strictly originate  
345 from the adult female. Other peptidases including cathepsins participate in invasion of the skin by the  
346 cercaria (Dvorak et al., 2008), haemoglobin degradation by the adult stage (Gotz and Klinkert,  
347 1993;Dalton et al., 1995), and egg hatching (Rinaldi et al., 2009), and have prominent immunogenic  
348 properties (Soloviova et al., 2019). Females secreted several cathepsins more abundantly than males,  
349 including SmCB1 (Q8MNY2\_SCHMA), which is known to be secreted from the gut of schistosomes

350 and to contribute to Th2 polarization responses (de Oliveira Fraga et al., 2010). This enzyme has  
351 been validated as a potent anti-schistosome chemotherapeutic target (Abdulla et al., 2007;Jilkova et  
352 al., 2021).

353 We found a number of other well-characterised vaccine candidates upregulated in the secretome of  
354 male worms (i.e., Sm14 (Smp\_095360.1, FABP\_SCHMA), GST26 (Smp\_163610.1,  
355 GST26\_SCHMA), GST28 (Smp\_054160.1, GST28\_SCHMA), three paramyosin isoforms  
356 (Smp\_046060.1 , A0A3Q0KFC2\_SCHMA; Smp\_085540.6, A0A3Q0KIP4\_SCHMA;  
357 Smp\_021920.3, A0A3Q0KD88\_SCHMA)) as well as in the secretome of females (i.e. Sm-TSP-2  
358 (Smp\_335630.1, A0A5K4F8N6\_SCHMA), thioredoxin glutathione reductase  
359 (A0A5K4EE66\_SCHMA), cathepsin B-1 (Smp\_103610.1, Q8MNY2\_SCHMA) and several saposins  
360 (Smp\_194910.1, G4VHH1\_SCHMA; Smp\_130100.1, G4VBU4\_SCHMA, Smp\_105450.1,  
361 A0A3Q0KK40\_SCHMA)). Unexpectedly, most tetraspanins identified were significantly  
362 upregulated in the secretome of female worms. Sm-TSP-2 formulated with glucopyranosyl lipid  
363 adjuvant has proven safe in a phase I trial (Keitel et al., 2019), and a homolog in *S. haematobium*  
364 (Sh-TSP-2) showed efficacy in a heterologous mouse model of schistosomiasis (Mekonnen et al.,  
365 2020). Furthermore, tetraspanins have been successfully tested as diagnostic candidates against  
366 urogenital schistosomiasis (Pearson et al., 2021;Mekonnen et al., 2022). Interestingly, we found five  
367 other tetraspanins uniquely present in the secretome of females, and their study as vaccine or  
368 diagnostic candidates could be of interest. It is noteworthy that both GSTs (GST26 and GST28) were  
369 upregulated in the secretome of males. Although GSTs have been widely studied as vaccine  
370 candidates (Riveau et al., 1998), recent reports reveal a lack of efficacy against urogenital  
371 schistosomiasis in children (Riveau et al., 2018).

372 We have additionally identified 75 and 237 proteins uniquely secreted by female and male worms,  
373 respectively. These proteins likely play key roles in schistosome biology, notably male-female  
374 communication. Recent reports have highlighted the secretion by male schistosomes of a specific  
375 small molecule ( $\beta$ -alanyl-tryptamine) that is key for the development and laying of eggs by females  
376 (Chen et al., 2022) ( $\beta$ -alanyl-tryptamine is a small peptide of ~300 Daltons in mass which would not  
377 have been retained when our samples were prepared during centrifugation which employed a 3 kDa  
378 cutoff membrane.) Furthermore, in *S. japonicum*, biogenic amine neurotransmitters have been shown  
379 to be also highly implicated in male-female sexual communication (Wang et al., 2017). Based on the  
380 present findings, we posit that the development of drugs interrupting male-female communication  
381 could lead to novel and effective control measures.

382 To conclude, a better breadth of coverage of the adult stages of *S. mansoni* ESP profile, and a deeper  
383 understanding of the most highly secreted proteins will be of importance for basic science aimed at  
384 understanding schistosome biology, thus will provide important information for the development of  
385 novel vaccine strategies against this major neglected tropical disease. Moreover, identification of the  
386 most abundantly secreted proteins of both sexes enables future analysis of the regulatory elements  
387 and motifs that control the expression of the corresponding genes can assist with the development of  
388 transgenic schistosomes that over-express endogenous proteins, or even secrete foreign proteins.  
389 Access by the field to transgenic schistosomes that (conditionally) secrete reporters, model antigens,  
390 and other informative gene products, along with advances in human challenge models (Langenberg et  
391 al., 2020) can be expected to lead to noteworthy progress in the immunobiology and pharmacology  
392 of these flukes (Hoffmann et al., 2014; Zamanian and Andersen, 2016; McVeigh and Maule,  
393 2019; Douglas et al., 2021; Quinzo et al., 2022).

394

## 395 5 References

- 396 Abdulla, M.H., Lim, K.C., Sajid, M., Mckerrow, J.H., and Caffrey, C.R. (2007). Schistosomiasis  
397 mansoni: novel chemotherapy using a cysteine protease inhibitor. *PLoS Med* 4, e14.
- 398 Acharya, S., Da'dara, A.A., and Skelly, P.J. (2021). Schistosome immunomodulators. *PLoS Pathog*  
399 17, e1010064.
- 400 Anderson, L., Amaral, M.S., Beckedorff, F., Silva, L.F., Dazzani, B., Oliveira, K.C., Almeida, G.T.,  
401 Gomes, M.R., Pires, D.S., Setubal, J.C., Demarco, R., and Verjovski-Almeida, S. (2015).  
402 *Schistosoma mansoni* Egg, Adult Male and Female Comparative Gene Expression Analysis  
403 and Identification of Novel Genes by RNA-Seq. *PLoS Negl Trop Dis* 9, e0004334.
- 404 Armstrong, J.C. (1965). Mating Behavior and Development of Schistosomes in the Mouse. *The*  
405 *Journal of Parasitology* 51, 605-616.
- 406 Basch, P.F., and Basch, N. (1984). Intergeneric reproductive stimulation and parthenogenesis in  
407 *Schistosoma mansoni*. *Parasitology* 89 ( Pt 2), 369-376.
- 408 Bindea, G., Mlecnik, B., Hackl, H., Charoentong, P., Tosolini, M., Kirilovsky, A., Fridman, W.H.,  
409 Pagès, F., Trajanoski, Z., and Galon, J. (2009). ClueGO: a Cytoscape plug-in to decipher  
410 functionally grouped gene ontology and pathway annotation networks. *Bioinformatics* 25,  
411 1091-1093.
- 412 Boissier, J., Grech-Angelini, S., Webster, B.L., Allienne, J.F., Huyse, T., Mas-Coma, S., Toulza, E.,  
413 Barré-Cardi, H., Rollinson, D., Kincaid-Smith, J., Oleaga, A., Galinier, R., Foata, J., Rognon,  
414 A., Berry, A., Mouahid, G., Henneron, R., Moné, H., Noel, H., and Mitta, G. (2016).  
415 Outbreak of urogenital schistosomiasis in Corsica (France): an epidemiological case study.  
416 *Lancet Infect Dis* 16, 971-979.
- 417 Braschi, S., Borges, W.C., and Wilson, R.A. (2006a). Proteomic analysis of the schistosome  
418 tegument and its surface membranes. *Mem Inst Oswaldo Cruz* 101 Suppl 1, 205-212.
- 419 Braschi, S., Curwen, R.S., Ashton, P.D., Verjovski-Almeida, S., and Wilson, A. (2006b). The  
420 tegument surface membranes of the human blood parasite *Schistosoma mansoni*: a proteomic  
421 analysis after differential extraction. *Proteomics* 6, 1471-1482.
- 422 Braschi, S., and Wilson, R.A. (2006). Proteins exposed at the adult schistosome surface revealed by  
423 biotinylation. *Mol Cell Proteomics* 5, 347-356.
- 424 Cai, P., Liu, S., Piao, X., Hou, N., Gobert, G.N., Mcmanus, D.P., and Chen, Q. (2016).  
425 Comprehensive Transcriptome Analysis of Sex-Biased Expressed Genes Reveals Discrete  
426 Biological and Physiological Features of Male and Female *Schistosoma japonicum*. *PLoS*  
427 *Negl Trop Dis* 10, e0004684.
- 428 Cesari, I.M., Ballen, D.E., Perrone, T., Oriol, O., Hoebeke, J., and Bout, D. (2000). Enzyme  
429 Activities in *Schistosoma mansoni* Soluble Egg Antigen. *Journal of Parasitology* 86, 1137-  
430 1140.
- 431 Cheever, A.W., Macedonia, J.G., Mosimann, J.E., and Cheever, E.A. (1994). Kinetics of egg  
432 production and egg excretion by *Schistosoma mansoni* and *S. japonicum* in mice infected  
433 with a single pair of worms. *Am J Trop Med Hyg* 50, 281-295.

- 434 Chen, R., Wang, J., Gradinaru, I., Vu, H.S., Geboers, S., Naidoo, J., Ready, J.M., Williams, N.S.,  
435 Deberardinis, R.J., Ross, E.M., and Collins, J.J., 3rd (2022). A male-derived nonribosomal  
436 peptide pheromone controls female schistosome development. *Cell*.
- 437 Choi, M., Chang, C.Y., Clough, T., Broudy, D., Killeen, T., Maclean, B., and Vitek, O. (2014).  
438 MSstats: an R package for statistical analysis of quantitative mass spectrometry-based  
439 proteomic experiments. *Bioinformatics* 30, 2524-2526.
- 440 Colley, D.G., Bustinduy, A.L., Secor, W.E., and King, C.H. (2014). Human schistosomiasis. *Lancet*  
441 383, 2253-2264.
- 442 Da Veiga Leprevost, F., Haynes, S.E., Avtonomov, D.M., Chang, H.Y., Shanmugam, A.K.,  
443 Mellacheruvu, D., Kong, A.T., and Nesvizhskii, A.I. (2020). Philosopher: a versatile toolkit  
444 for shotgun proteomics data analysis. *Nat Methods* 17, 869-870.
- 445 Dalton, J.P., Clough, K.A., Jones, M.K., and Brindley, P.J. (1997). The cysteine proteinases of  
446 *Schistosoma mansoni* cercariae. *Parasitology* 114 ( Pt 2), 105-112.
- 447 Dalton, J.P., Smith, A.M., Clough, K.A., and Brindley, P.J. (1995). Digestion of haemoglobin by  
448 schistosomes: 35 years on. *Parasitol Today* 11, 299-303.
- 449 De Marco Verissimo, C., Potriquet, J., You, H., Mcmanus, D.P., Mulvenna, J., and Jones, M.K.  
450 (2019). Qualitative and quantitative proteomic analyses of *Schistosoma japonicum* eggs and  
451 egg-derived secretory-excretory proteins. *Parasit Vectors* 12, 173.
- 452 De Oliveira Fraga, L.A., Lamb, E.W., Moreno, E.C., Chatterjee, M., Dvorak, J., Delcroix, M., Sajid,  
453 M., Caffrey, C.R., and Davies, S.J. (2010). Rapid induction of IgE responses to a worm  
454 cysteine protease during murine pre-patent schistosome infection. *BMC Immunol* 11, 56.
- 455 Dessein, A.J., Begley, M., Demeure, C., Caillol, D., Fueri, J., Dos Reis, M.G., Andrade, Z.A., Prata,  
456 A., and Bina, J.C. (1988). Human resistance to *Schistosoma mansoni* is associated with IgG  
457 reactivity to a 37-kDa larval surface antigen. *J Immunol* 140, 2727-2736.
- 458 Douglas, B., Wei, Y., Li, X., Ferguson, A., Hung, L.Y., Pastore, C., Kurtz, J.R., Mclachlan, J.B.,  
459 Nolan, T.J., Lok, J., and Herbert, D.R. (2021). Transgenic expression of a T cell epitope in  
460 *Strongyloides ratti* reveals that helminth-specific CD4+ T cells constitute both Th2 and Treg  
461 populations. *PLoS Pathog* 17, e1009709.
- 462 Du, P., Giri, B.R., Liu, J., Xia, T., Grevelding, C.G., and Cheng, G. (2020). Proteomic and deep  
463 sequencing analysis of extracellular vesicles isolated from adult male and female *Schistosoma*  
464 *japonicum*. *PLoS Negl Trop Dis* 14, e0008618.
- 465 Dvořák, J., Fajtová, P., Ulrychová, L., Leontovyč, A., Rojo-Arreola, L., Suzuki, B.M., Horn, M.,  
466 Mareš, M., Craik, C.S., Caffrey, C.R., and O'donoghue, A.J. (2016). Excretion/secretion  
467 products from *Schistosoma mansoni* adults, eggs and schistosomula have unique peptidase  
468 specificity profiles. *Biochimie* 122, 99-109.
- 469 Dvorak, J., Mashiyama, S.T., Braschi, S., Sajid, M., Knudsen, G.M., Hansell, E., Lim, K.C., Hsieh,  
470 I., Bahgat, M., Mackenzie, B., Medzihradsky, K.F., Babbitt, P.C., Caffrey, C.R., and  
471 Mckerrow, J.H. (2008). Differential use of protease families for invasion by schistosome  
472 cercariae. *Biochimie* 90, 345-358.
- 473 Fitzpatrick, J.M., Johnston, D.A., Williams, G.W., Williams, D.J., Freeman, T.C., Dunne, D.W., and  
474 Hoffmann, K.F. (2005). An oligonucleotide microarray for transcriptome analysis of

- 475 *Schistosoma mansoni* and its application/use to investigate gender-associated gene  
476 expression. *Mol Biochem Parasitol* 141, 1-13.
- 477 Floudas, A., Cluxton, C.D., Fahel, J., Khan, A.R., Saunders, S.P., Amu, S., Alcami, A., and Fallon,  
478 P.G. (2017). Composition of the *Schistosoma mansoni* worm secretome: Identification of  
479 immune modulatory Cyclophilin A. *PLoS Negl Trop Dis* 11, e0006012.
- 480 Gobert, G.N., Stenzel, D.J., Mcmanus, D.P., and Jones, M.K. (2003). The ultrastructural architecture  
481 of the adult *Schistosoma japonicum* tegument. *Int J Parasitol* 33, 1561-1575.
- 482 Gotz, B., and Klinkert, M.Q. (1993). Expression and partial characterization of a cathepsin B-like  
483 enzyme (Sm31) and a proposed 'haemoglobinase' (Sm32) from *Schistosoma mansoni*.  
484 *Biochem J* 290 ( Pt 3), 801-806.
- 485 Goudot-Crozel, V., Caillol, D., Djabali, M., and Dessein, A.J. (1989). The major parasite surface  
486 antigen associated with human resistance to schistosomiasis is a 37-kD glyceraldehyde-3P-  
487 dehydrogenase. *J Exp Med* 170, 2065-2080.
- 488 Gupta, B.C., and Basch, P.F. (1987). Evidence for Transfer of a Glycoprotein from Male to Female  
489 *Schistosoma mansoni* during Pairing. *The Journal of Parasitology* 73, 674-675.
- 490 Hall, S.L., Braschi, S., Truscott, M., Mathieson, W., Cesari, I.M., and Wilson, R.A. (2011). Insights  
491 into blood feeding by schistosomes from a proteomic analysis of worm vomitus. *Mol*  
492 *Biochem Parasitol* 179, 18-29.
- 493 Hoffmann, K.F., Brindley, P.J., and Berriman, M. (2014). Medicine. Halting harmful helminths.  
494 *Science* 346, 168-169.
- 495 Huyse, T., Webster, B.L., Geldof, S., Stothard, J.R., Diaw, O.T., Polman, K., and Rollinson, D.  
496 (2009). Bidirectional introgressive hybridization between a cattle and human schistosome  
497 species. *PLoS Pathog* 5, e1000571.
- 498 Jilkova, A., Rubesova, P., Fanfrlik, J., Fajtova, P., Rezacova, P., Brynda, J., Lepsik, M., Mertlikova-  
499 Kaiserova, H., Emal, C.D., Renslo, A.R., Roush, W.R., Horn, M., Caffrey, C.R., and Mares,  
500 M. (2021). Druggable Hot Spots in the Schistosomiasis Cathepsin B1 Target Identified by  
501 Functional and Binding Mode Analysis of Potent Vinyl Sulfone Inhibitors. *ACS Infect Dis* 7,  
502 1077-1088.
- 503 Keitel, W.A., Potter, G.E., Diemert, D., Bethony, J., El Sahly, H.M., Kennedy, J.K., Patel, S.M.,  
504 Plieskatt, J.L., Jones, W., Deye, G., Bottazzi, M.E., Hotez, P.J., and Atmar, R.L. (2019). A  
505 phase 1 study of the safety, reactogenicity, and immunogenicity of a *Schistosoma mansoni*  
506 vaccine with or without glucopyranosyl lipid A aqueous formulation (GLA-AF) in healthy  
507 adults from a non-endemic area. *Vaccine* 37, 6500-6509.
- 508 Keller, A., Nesvizhskii, A.I., Kolker, E., and Aebersold, R. (2002). Empirical statistical model to  
509 estimate the accuracy of peptide identifications made by MS/MS and database search. *Anal*  
510 *Chem* 74, 5383-5392.
- 511 Kifle, D.W., Pearson, M.S., Becker, L., Pickering, D., Loukas, A., and Sotillo, J. (2020). Proteomic  
512 analysis of two populations of *Schistosoma mansoni*-derived extracellular vesicles: 15k pellet  
513 and 120k pellet vesicles. *Mol Biochem Parasitol* 236, 111264.
- 514 Kong, A.T., Leprevost, F.V., Avtonomov, D.M., Mellacheruvu, D., and Nesvizhskii, A.I. (2017).  
515 MSFragger: ultrafast and comprehensive peptide identification in mass spectrometry-based  
516 proteomics. *Nat Methods* 14, 513-520.

- 517 Langenberg, M.C.C., Hoogerwerf, M.A., Koopman, J.P.R., Janse, J.J., Kos-Van Oosterhoud, J., Feijt,  
518 C., Jochems, S.P., De Dood, C.J., Van Schuijlenburg, R., Ozir-Fazalalikhhan, A., Manurung,  
519 M.D., Sartono, E., Van Der Beek, M.T., Winkel, B.M.F., Verbeek-Menken, P.H., Stam, K.A.,  
520 Van Leeuwen, F.W.B., Meij, P., Van Diepen, A., Van Lieshout, L., Van Dam, G.J.,  
521 Corstjens, P., Hokke, C.H., Yazdanbakhsh, M., Visser, L.G., and Roestenberg, M. (2020). A  
522 controlled human *Schistosoma mansoni* infection model to advance novel drugs, vaccines and  
523 diagnostics. *Nat Med* 26, 326-332.
- 524 Liu, F., Cui, S.J., Hu, W., Feng, Z., Wang, Z.Q., and Han, Z.G. (2009). Excretory/secretory proteome  
525 of the adult developmental stage of human blood fluke, *Schistosoma japonicum*. *Mol Cell*  
526 *Proteomics* 8, 1236-1251.
- 527 Loker, E.S., and Brant, S.V. (2006). Diversification, dioecy and dimorphism in schistosomes. *Trends*  
528 *Parasitol* 22, 521-528.
- 529 Mathieson, W., and Wilson, R.A. (2010). A comparative proteomic study of the undeveloped and  
530 developed *Schistosoma mansoni* egg and its contents: the miracidium, hatch fluid and  
531 secretions. *Int J Parasitol* 40, 617-628.
- 532 Mcmanus, D.P., Dunne, D.W., Sacko, M., Utzinger, J., Vennervald, B.J., and Zhou, X.N. (2018).  
533 Schistosomiasis. *Nat Rev Dis Primers* 4, 13.
- 534 Mcveigh, P., and Maule, A.G. (2019). Can CRISPR help in the fight against parasitic worms? *Elife* 8.
- 535 Mekonnen, G.G., Tedla, B.A., Pearson, M.S., Becker, L., Field, M., Amoah, A.S., Van Dam, G.,  
536 Corstjens, P., Mduluzza, T., Mutapi, F., Loukas, A., and Sotillo, J. (2022). Characterisation of  
537 tetraspanins from *Schistosoma haematobium* and evaluation of their potential as novel  
538 diagnostic markers. *PLoS Negl Trop Dis* 16, e0010151.
- 539 Mekonnen, G.G., Tedla, B.A., Pickering, D., Becker, L., Wang, L., Zhan, B., Bottazzi, M.E., Loukas,  
540 A., Sotillo, J., and Pearson, M.S. (2020). *Schistosoma haematobium* Extracellular Vesicle  
541 Proteins Confer Protection in a Heterologous Model of Schistosomiasis. *Vaccines (Basel)* 8.
- 542 Moore, D.V., Yolles, T.K., and Meleney, H.E. (1954). The Relationship of Male Worms to the  
543 Sexual Development of Female *Schistosoma mansoni*. *The Journal of Parasitology* 40, 166-  
544 185.
- 545 Nesvizhskii, A.I., Keller, A., Kolker, E., and Aebersold, R. (2003). A statistical model for identifying  
546 proteins by tandem mass spectrometry. *Anal Chem* 75, 4646-4658.
- 547 Neves, L.X., Wilson, R.A., Brownridge, P., Harman, V.M., Holman, S.W., Beynon, R.J., Evers, C.E.,  
548 Demarco, R., and Castro-Borges, W. (2020). Quantitative Proteomics of Enriched Esophageal  
549 and Gut Tissues from the Human Blood Fluke *Schistosoma mansoni* Pinpoints Secreted  
550 Proteins for Vaccine Development. *J Proteome Res* 19, 314-326.
- 551 Pearce, E.J., and Macdonald, A.S. (2002). The immunobiology of schistosomiasis. *Nat Rev Immunol*  
552 2, 499-511.
- 553 Pearson, M.S., Tedla, B.A., Mekonnen, G.G., Proietti, C., Becker, L., Nakajima, R., Jasinskas, A.,  
554 Doolan, D.L., Amoah, A.S., Knopp, S., Rollinson, D., Ali, S.M., Kabole, F., Hokke, C.H.,  
555 Adegnik, A.A., Field, M.A., Van Dam, G., Corstjens, P., Mduluzza, T., Mutapi, F., Oeuvray,  
556 C., Greco, B., Chaiyadet, S., Laha, T., Cai, P., Mcmanus, D.P., Bottazzi, M.E., Felgner, P.L.,  
557 Sotillo, J., and Loukas, A. (2021). Immunomics-guided discovery of serum and urine

- 558 antibodies for diagnosing urogenital schistosomiasis: a biomarker identification study. *Lancet*  
559 *Microbe* 2, e617-e626.
- 560 Perez-Sanchez, R., Valero, M.L., Ramajo-Hernandez, A., Siles-Lucas, M., Ramajo-Martin, V., and  
561 Oleaga, A. (2008). A proteomic approach to the identification of tegumental proteins of male  
562 and female *Schistosoma bovis* worms. *Mol Biochem Parasitol* 161, 112-123.
- 563 Phuphisut, O., Ajawatanawong, P., Limpanont, Y., Reamtong, O., Nuamtanong, S., Ampawong, S.,  
564 Chaimon, S., Dekumyoy, P., Watthanakulpanich, D., Swierczewski, B.E., and Adisakwattana,  
565 P. (2018). Transcriptomic analysis of male and female *Schistosoma mekongi* adult worms.  
566 *Parasit Vectors* 11, 504.
- 567 Picard, M.A., Boissier, J., Roquis, D., Grunau, C., Allienne, J.F., Duval, D., Toulza, E., Arancibia,  
568 N., Caffrey, C.R., Long, T., Nidelet, S., Rohmer, M., and Cosseau, C. (2016). Sex-Biased  
569 Transcriptome of *Schistosoma mansoni*: Host-Parasite Interaction, Genetic Determinants and  
570 Epigenetic Regulators Are Associated with Sexual Differentiation. *PLoS Negl Trop Dis* 10,  
571 e0004930.
- 572 Quinzo, M.J., Perteguer, M.J., Brindley, P.J., Loukas, A., and Sotillo, J. (2022). Transgenesis in  
573 parasitic helminths: a brief history and prospects for the future. *Parasit Vectors* 15, 110.
- 574 Rinaldi, G., Morales, M.E., Alrefaei, Y.N., Cancela, M., Castillo, E., Dalton, J.P., Tort, J.F., and  
575 Brindley, P.J. (2009). RNA interference targeting leucine aminopeptidase blocks hatching of  
576 *Schistosoma mansoni* eggs. *Mol Biochem Parasitol* 167, 118-126.
- 577 Riveau, G., Poulain-Godefroy, O.P., Dupre, L., Remoue, F., Mielcarek, N., Locht, C., and Capron, A.  
578 (1998). Glutathione S-transferases of 28kDa as major vaccine candidates against  
579 schistosomiasis. *Mem Inst Oswaldo Cruz* 93 Suppl 1, 87-94.
- 580 Riveau, G., Schacht, A.M., Dompnier, J.P., Deplanque, D., Seck, M., Waucquier, N., Senghor, S.,  
581 Delcroix-Genete, D., Hermann, E., Idris-Khodja, N., Levy-Marchal, C., Capron, M., and  
582 Capron, A. (2018). Safety and efficacy of the rSh28GST urinary schistosomiasis vaccine: A  
583 phase 3 randomized, controlled trial in Senegalese children. *PLoS Negl Trop Dis* 12,  
584 e0006968.
- 585 Rothe, C., Zimmer, T., Schunk, M., Wallrauch, C., Helfrich, K., Gultekin, F., Bretzel, G., Allienne,  
586 J.F., and Boissier, J. (2021). Developing Endemicity of Schistosomiasis, Corsica, France.  
587 *Emerg Infect Dis* 27.
- 588 Schwartz, C., and Fallon, P.G. (2018). *Schistosoma* "Eggs-Itting" the Host: Granuloma Formation and  
589 Egg Excretion. *Front Immunol* 9, 2492.
- 590 Skelly, P.J., Da'dara, A.A., Li, X.H., Castro-Borges, W., and Wilson, R.A. (2014). Schistosome  
591 feeding and regurgitation. *PLoS Pathog* 10, e1004246.
- 592 Soloviova, K., Fox, E.C., Dalton, J.P., Caffrey, C.R., and Davies, S.J. (2019). A secreted schistosome  
593 cathepsin B1 cysteine protease and acute schistosome infection induce a transient T helper 17  
594 response. *PLoS Negl Trop Dis* 13, e0007070.
- 595 Sotillo, J., Pearson, M., Potriquet, J., Becker, L., Pickering, D., Mulvenna, J., and Loukas, A. (2016).  
596 Extracellular vesicles secreted by *Schistosoma mansoni* contain protein vaccine candidates.  
597 *Int J Parasitol* 46, 1-5.
- 598 Sotillo, J., Pearson, M.S., Becker, L., Mekonnen, G.G., Amoah, A.S., Van Dam, G., Corstjens, P.,  
599 Murray, J., Mduluzza, T., Mutapi, F., and Loukas, A. (2019). In-depth proteomic



- 600 characterization of *Schistosoma haematobium*: Towards the development of new tools for  
601 elimination. *PLoS Negl Trop Dis* 13, e0007362.
- 602 Tallima, H., Dvorak, J., Kareem, S., Abou El Dahab, M., Abdel Aziz, N., Dalton, J.P., and El Ridi,  
603 R. (2017). Protective immune responses against *Schistosoma mansoni* infection by  
604 immunization with functionally active gut-derived cysteine peptidases alone and in  
605 combination with glyceraldehyde 3-phosphate dehydrogenase. *PLoS Negl Trop Dis* 11,  
606 e0005443.
- 607 Vizcaino, J.A., Cote, R.G., Csordas, A., Dianes, J.A., Fabregat, A., Foster, J.M., Griss, J., Alpi, E.,  
608 Birim, M., Contell, J., O'Kelly, G., Schoenegger, A., Ovelleiro, D., Perez-Riverol, Y.,  
609 Reisinger, F., Rios, D., Wang, R., and Hermjakob, H. (2013). The PRoteomics  
610 IDentifications (PRIDE) database and associated tools: status in 2013. *Nucleic Acids Res* 41,  
611 D1063-1069.
- 612 Wang, J., Yu, Y., Shen, H., Qing, T., Zheng, Y., Li, Q., Mo, X., Wang, S., Li, N., Chai, R., Xu, B.,  
613 Liu, M., Brindley, P.J., Mcmanus, D.P., Feng, Z., Shi, L., and Hu, W. (2017). Dynamic  
614 transcriptomes identify biogenic amines and insect-like hormonal regulation for mediating  
615 reproduction in *Schistosoma japonicum*. *Nat Commun* 8, 14693.
- 616 Wang, W., Bergquist, R., King, C.H., and Yang, K. (2021). Elimination of schistosomiasis in China:  
617 Current status and future prospects. *PLoS Negl Trop Dis* 15, e0009578.
- 618 Webster, B.L., Southgate, V.R., and Littlewood, D.T. (2006). A revision of the interrelationships of  
619 *Schistosoma* including the recently described *Schistosoma guineensis*. *Int J Parasitol* 36, 947-  
620 955.
- 621 Wilson, R.A. (2012). Proteomics at the schistosome-mammalian host interface: any prospects for  
622 diagnostics or vaccines? *Parasitology* 139, 1178-1194.
- 623 Yu, F., Haynes, S.E., and Nesvizhskii, A.I. (2021). IonQuant Enables Accurate and Sensitive Label-  
624 Free Quantification With FDR-Controlled Match-Between-Runs. *Mol Cell Proteomics* 20,  
625 100077.
- 626 Zamanian, M., and Andersen, E.C. (2016). Prospects and challenges of CRISPR/Cas genome editing  
627 for the study and control of neglected vector-borne nematode diseases. *Febs j* 283, 3204-  
628 3221.
- 629 Zhang, M., Hong, Y., Han, Y., Han, H., Peng, J., Qiu, C., Yang, J., Lu, K., Fu, Z., and Lin, J. (2013).  
630 Proteomic analysis of tegument-exposed proteins of female and male *Schistosoma japonicum*  
631 worms. *J Proteome Res* 12, 5260-5270.

632

## 633 **6 Conflict of Interest**

634 The authors declare that the research was conducted in the absence of any commercial or financial  
635 relationships that could be construed as a potential conflict of interest.

636

## 637 **7 Author Contributions**

638 VHM, ETK, WI, PJB and JS designed the experiments, ETK, MM, BAR, BKB, AL, PJB and JS  
639 analysed the data, and JS, ETK, VHM, and PJB drafted the manuscript with input from all the co-  
640 authors; WI, EKT, VHM contributed the helminth materials JS performed mass spectrometry focused  
641 analysis; JS, AL, and PJB supervised the project. JS, AL, MM, PJB and BKB arranged the funding.  
642 All authors read and approved the final draft.

643

## 644 **8 Funding**

645 The findings were obtained from work partially supported by the Defense Advanced Research  
646 Projects Agency (DARPA) and Naval Information Warfare Center Pacific (NIWC Pacific), under  
647 Contract No. N66001-21-C-4013 (Approved for Public Release, Distribution Unlimited).

648

## 649 **9 Acknowledgments**

650 The proteomic analysis was performed in the proteomics facility of SCSIE University of Valencia.  
651 For the purposes of Open Access, the authors have applied a CC BY public copyright license to any  
652 Author Accepted Manuscript version arising from this submission. Schistosome-infected mice and  
653 adult schistosomes were provided by the NIAID Schistosomiasis Resource Center of the Biomedical  
654 Research Institute, Rockville, Maryland through NIH-NIAID Contract HHSN272201000005I for  
655 distribution through BEI Resources. The findings were obtained from work partially supported by the  
656 Defense Advanced Research Projects Agency (DARPA) and Naval Information Warfare Center

657 Pacific (NIWC Pacific), under Contract No. N66001-21-C-4013 (Approved for Public Release,  
658 Distribution Unlimited). The views, opinions, and/or findings expressed are those of the authors and  
659 should not be interpreted as representing the official views or policies of the Department of Defense  
660 or the U.S. Government.

## 661 **10 Data Availability Statement**

662 Mass spectrometry data along with the identification results have been deposited in the  
663 ProteomeXchange Consortium via the PRIDE partner repository with the dataset identifier  
664 PXD030699.

665

## 666 **11 Figure legends**

667 **Supplementary Figure 1.** Data normalisation using medians of summed intensities after label-free  
668 quantitative analysis.

669 **Supplementary Figure 2.** Power calculation and false discovery rate of the label-free quantitative  
670 analysis performed using MSstats.

671 **Supplementary Figure 3.** Volcano plot of *Schistosoma mansoni* secreted proteins from male vs  
672 male-female (mix). No statistically significant differences were observed.

673

674

675 **Table 1.** Top 20 most abundant proteins secreted by male *Schistosoma mansoni* adult worms.

## Proteome of excretions and secretions of an adult schistosome

| Protein          | Annotation                                     | Log <sub>2</sub> FC | Adjusted P-value |
|------------------|------------------------------------------------|---------------------|------------------|
| TPM1_SCHMA       | Tropomyosin-1 (SmTMI)                          | 4.55                | 0.0015           |
| G4LWI3_SCHMA     | Aldehyde dehydrogenase, putative               | 4.48                | 0.0009           |
| G4VCN1_SCHMA     | Putative fatty acid binding protein            | 3.94                | 0.0001           |
| G4VSB7_SCHMA     | LIMPETin; Putative four and A half lim domains | 3.93                | 0.0011           |
| G4LX89_SCHMA     | Cofilin, actophorin, putative                  | 3.92                | 0.0011           |
| A0A3Q0KD88_SCHMA | Paramyosin                                     | 3.82                | 0.0011           |
| TPM2_SCHMA       | Tropomyosin-2 (SmTMII)                         | 3.78                | 0.0017           |
| G4M0V2_SCHMA     | Transgelin                                     | 3.78                | 0.0021           |
| A0A5K4EZE2_SCHMA | Troponin t, putative                           | 3.66                | 0.0025           |
| ALF_SCHMA        | Fructose-bisphosphate aldolase                 | 3.65                | 0.0001           |
| G4VJG3_SCHMA     | Putative crp1/csrp1/crip1                      | 3.53                | 0.0015           |
| Q15EU2_SCHMA     | Cytochrome c-like protein                      | 3.51                | 0.0004           |
| A0A3Q0KPD3_SCHMA | Putative EF-hand containing protein            | 3.43                | 0.0008           |
| A0A3Q0KF84_SCHMA | Putative myosin light chain 1                  | 3.42                | 0.0157           |
| SM20_SCHMA       | 20 kDa calcium-binding protein (Antigen SM20)  | 3.31                | 0.0182           |
| FABP_SCHMA       | 14 kDa fatty acid-binding protein (Sm14)       | 3.22                | 0.0011           |
| G4VN13_SCHMA     | Uncharacterized protein                        | 3.19                | 0.0023           |
| A0A3Q0KCV6_SCHMA | Putative troponin I                            | 3.19                | 0.0009           |
| A0A3Q0KH21_SCHMA | Pyruvate kinase                                | 3.08                | 0.0004           |
| A0A3Q0KB95_SCHMA | Filamin                                        | 3.04                | 0.0005           |

676 **Table 2.** Top 20 most abundant proteins secreted by female *Schistosoma mansoni* adult worms.

| Protein          | Annotation                                                | Log <sub>2</sub> FC | Adjusted P-value |
|------------------|-----------------------------------------------------------|---------------------|------------------|
| A0A3Q0KC43_SCHMA | Deoxyribonuclease II-related                              | -6.46               | 0.0092           |
| A0A3Q0KBJ8_SCHMA | Lysosomal Pro-Xaa carboxypeptidase (S28 family)           | -5.97               | 0.0004           |
| G4VBG5_SCHMA     | Ferritin                                                  | -5.58               | 0.0006           |
| A0A5K4FCS2_SCHMA | Cathepsin L                                               | -5.27               | 0.0054           |
| A0A3Q0KMS2_SCHMA | Uncharacterized protein                                   | -5.24               | 0.0012           |
| A0A3Q0KF32_SCHMA | Beta-glucosidase                                          | -5.04               | 0.0010           |
| G4VRT6_SCHMA     | Family S28 unassigned peptidase (S28 family)              | -4.11               | 0.0011           |
| G4VRB5_SCHMA     | Putative ectonucleotide pyrophosphatase/phosphodiesterase | -4.02               | 0.0007           |
| G4VBG6_SCHMA     | Ferritin                                                  | -3.88               | 0.0006           |
| A0A3Q0KJ08_SCHMA | Putative macroglobulin/complement                         | -3.88               | 0.0004           |
| Q8MNY2_SCHMA     | Cathepsin B1 isotype 1                                    | -3.87               | 0.0048           |
| A0A3Q0KN25_SCHMA | Peptidase C1 family                                       | -3.86               | 0.0011           |
| A0A3Q0KU93_SCHMA | ML domain-containing protein                              | -3.77               | 0.0001           |
| A0A3Q0KK40_SCHMA | Saposin containing protein                                | -3.66               | 0.0034           |
| G4V7C7_SCHMA     | Uncharacterized protein                                   | -3.64               | 0.0002           |
| A0A3Q0KTA0_SCHMA | Uncharacterized protein                                   | -3.60               | 0.0056           |
| G4LUV4_SCHMA     | Subfamily C1A non-peptidase homologue (C01 family)        | -3.55               | 0.0010           |
| A0A3Q0KGW0_SCHMA | Ferritin                                                  | -3.40               | 0.0028           |
| A0A5K4EGY8_SCHMA | Putative annexin                                          | -3.15               | 0.0014           |
| A0A3Q0KMJ7_SCHMA | Putative programmed cell death protein                    | -3.15               | 0.0210           |

## Proteome of excretions and secretions of an adult schistosome

677
